# Supplementary material
Source: PubMed Central journal article supplement (PMC6287260)
Supplement: NIHMS999276-supplement-1.pdf [file NIHMS999276-supplement-1.pdf]

## SUPPLEMENTARY MATERIAL

Comparative study of tumor targeting and biodistribution of pH (Low) Insertion Peptides (pHLIP<sup>®</sup> peptides) conjugated with different fluorescent dyes

*Ramona-Cosmina Adochite, Anna Moshnikova, Jovana Golijanin, Oleg A. Andreev, Natallia Katenka, Yana K. Reshetnyak*

**Table S1.** Mean surface fluorescence obtained from the organs and tissue at different time points after single i.v. administration of the fluorescent conjugates. Values for the control represent baseline autofluorescence signal from animals with no injection of fluorescent conjugates. The number of animals for each time point and each conjugate is indicated by *n*.

| <b>AF546-pHLIPs</b> |                            |                          |                            |                              |                            |                |
|---------------------|----------------------------|--------------------------|----------------------------|------------------------------|----------------------------|----------------|
| <b>Organs</b>       | <b>Time post-injection</b> | <b>WT<br/><i>n</i>=6</b> | <b>Var3<br/><i>n</i>=6</b> | <b>Var3-C<br/><i>n</i>=3</b> | <b>Var7<br/><i>n</i>=6</b> | <b>Control</b> |
| <b>Muscle</b>       | <b>2 hrs</b>               | 1057.0 ± 137.8           | 963.4 ± 120.8              | 281.6 ± 23.3                 | 1150.2 ± 126.6             | 156.3          |
|                     | <b>4 hrs</b>               | 1212.0 ± 189.4           | 1117.9 ± 167.3             | 283.8 ± 52.6                 | 756.9 ± 34.9               |                |
|                     | <b>24 hrs</b>              | 249.4 ± 23.2             | 297.7 ± 28.6               | 209.5 ± 18.6                 | 191.2 ± 8.34               |                |
|                     | <b>48 hrs</b>              | 193.6 ± 18.0             | 201.0 ± 13.3               |                              | 179.4 ± 16.1               |                |
| <b>Tumor</b>        | <b>2 hrs</b>               | 3856.7 ± 1058.5          | 4664.5 ± 720.4             | 834.6 ± 86.6                 | 3267.1 ± 690.0             | 170.2          |
|                     | <b>4 hrs</b>               | 5716.8 ± 1284.8          | 5809.9 ± 880.4             | 847.3 ± 162.2                | 3514.1 ± 622.9             |                |
|                     | <b>24 hrs</b>              | 1287 ± 290.4             | 2772.9 ± 600.3             | 1168.5 ± 299.8               | 810.4 ± 196.2              |                |
|                     | <b>48 hrs</b>              | 999.5 ± 129.8            | 1229.6 ± 281.9             |                              | 516.7 ± 128.9              |                |
| <b>Liver</b>        | <b>2 hrs</b>               | 1671.7 ± 148.7           | 1670.3 ± 409.5             | 380.3 ± 39.2                 | 805.8 ± 112.4              | 144.2          |
|                     | <b>4 hrs</b>               | 1984.0 ± 27.9            | 1448.7 ± 317.7             | 288.4 ± 11.8                 | 623.6 ± 77.2               |                |
|                     | <b>24 hrs</b>              | 502.5 ± 85.6             | 303.4 ± 64.4               | 229.5 ± 17.6                 | 217.0 ± 21.8               |                |
|                     | <b>48 hrs</b>              | 357.2 ± 24.6             | 254.9 ± 37.2               |                              | 193 ± 20.6                 |                |
| <b>Kidney</b>       | <b>2 hrs</b>               | 1235.5 ± 182.2           | 880.3 ± 51.2               | 326.8 ± 83.1                 | 1346.8 ± 145.8             | 156.4          |
|                     | <b>4 hrs</b>               | 1099.2 ± 254.3           | 1148.4 ± 326.7             | 327.7 ± 41.3                 | 1045.2 ± 144.4             |                |
|                     | <b>24 hrs</b>              | 544.8 ± 85.9             | 1288.7 ± 253.3             | 291.9 ± 17.9                 | 821.3 ± 122.5              |                |
|                     | <b>48 hrs</b>              | 485.4 ± 126.5            | 918.5 ± 225.9              |                              | 690.5 ± 259.6              |                |
| <b>AF647-pHLIPs</b> |                            |                          |                            |                              |                            |                |
| <b>Organs</b>       | <b>Time post-injection</b> | <b>WT<br/><i>n</i>=3</b> | <b>Var3<br/><i>n</i>=3</b> | <b>Var7<br/><i>n</i>=3</b>   | <b>Control</b>             |                |
| <b>Muscle</b>       | <b>2 hrs</b>               | 2617.5 ± 616.0           | 4940.6 ± 527.6             | 1818.8 ± 200.0               | 980.7                      |                |
|                     | <b>4 hrs</b>               | 2093.2 ± 111.4           | 3467.6 ± 839.4             | 1569.0 ± 275.9               |                            |                |
|                     | <b>24 hrs</b>              | 932.8 ± 49.0             | 1054.8 ± 121.0             | 1016.0 ± 171.7               |                            |                |
| <b>Tumor</b>        | <b>2 hrs</b>               | 7498.5 ± 1480.5          | 14565.3 ± 1577.3           | 6556.0 ± 1013.2              | 1125.5                     |                |
|                     | <b>4 hrs</b>               | 6798.8 ± 221.9           | 12099.6 ± 255.7            | 4781.5 ± 675.1               |                            |                |
|                     | <b>24 hrs</b>              | 2480.1 ± 290.3           | 3948.6 ± 2212.7            | 2832.5 ± 588.2               |                            |                |
| <b>Liver</b>        | <b>2 hrs</b>               | 5311.2 ± 97.9            | 9832.4 ± 622.3             | 2598.1 ± 335.6               | 525.6                      |                |

|                            |                            |                      |                      |                       |                     |                |
|----------------------------|----------------------------|----------------------|----------------------|-----------------------|---------------------|----------------|
|                            | <b>4 hrs</b>               | 5137.2 ± 1330.5      | 7615.7 ± 1028.3      | 1921.6 ± 351.0        |                     |                |
|                            | <b>24 hrs</b>              | 1680.4 ± 490.3       | 1327.4 ± 298.0       | 1091.4 ± 175.4        |                     |                |
| <b>Kidney</b>              | <b>2 hrs</b>               | 8516.0 ± 1611.7      | 16126.9 ± 2787.4     | 10112.8 ± 391.6       | 552.6               |                |
|                            | <b>4 hrs</b>               | 9135.8 ± 1167.8      | 14325.3 ± 1332.3     | 10696.1 ± 1726.5      |                     |                |
|                            | <b>24 hrs</b>              | 3778.7 ± 550.7       | 6081.2 ± 2036.8      | 8461.9 ± 4773.8       |                     |                |
| <b>AF750-pHLIPs</b>        |                            |                      |                      |                       |                     |                |
| <b>Organs</b>              | <b>Time post-injection</b> | <b>WT<br/>n=3</b>    | <b>Var3<br/>n=3</b>  | <b>Var7<br/>n=3</b>   | <b>Control</b>      |                |
| <b>Muscle</b>              | <b>2 hrs</b>               | 889.8 ± 87.2         | 1002.6 ± 30.7        | 749.4 ± 21.4          | 127.3               |                |
|                            | <b>4 hrs</b>               | 700.2 ± 117.8        | 836.3 ± 123.7        | 401.0 ± 40.8          |                     |                |
|                            | <b>24 hrs</b>              | 275.5 ± 10.1         | 228.0 ± 24.5         | 169.0 ± 10.8          |                     |                |
|                            | <b>48 hrs</b>              | 168.7 ± 7.3          | 150.4 ± 4.2          | 144.8 ± 0.3           |                     |                |
| <b>Tumor</b>               | <b>2 hrs</b>               | 2847.7 ± 40.1        | 3800.4 ± 226.1       | 2301.2 ± 172.6        | 135.4               |                |
|                            | <b>4 hrs</b>               | 2897.5 ± 610.4       | 3542.2 ± 431.8       | 1256.4 ± 110.8        |                     |                |
|                            | <b>24 hrs</b>              | 1118.9 ± 76.5        | 650.9 ± 88.8         | 260.7 ± 10.3          |                     |                |
|                            | <b>48 hrs</b>              | 414.6 ± 23.7         | 236.8 ± 15.7         | 180.8 ± 16.9          |                     |                |
| <b>Liver</b>               | <b>2 hrs</b>               | 3577.2 ± 375.5       | 4618.6 ± 183.6       | 1722.5 ± 350.7        | 140.3               |                |
|                            | <b>4 hrs</b>               | 3776.3 ± 1111.3      | 2401.4 ± 344.5       | 1087.8 ± 13.4         |                     |                |
|                            | <b>24 hrs</b>              | 1370.9 ± 104.7       | 553.2 ± 46.8         | 342.7 ± 19.3          |                     |                |
|                            | <b>48 hrs</b>              | 363.1 ± 36.6         | 286.9 ± 11.6         | 226.8 ± 21.7          |                     |                |
| <b>Kidney</b>              | <b>2 hrs</b>               | 7413.1 ± 881.7       | 9417.1 ± 862.6       | 7146.2 ± 419.3        | 143.5               |                |
|                            | <b>4 hrs</b>               | 7664.2 ± 1328.6      | 7891.6 ± 984.4       | 7131.0 ± 552.1        |                     |                |
|                            | <b>24 hrs</b>              | 2459.8 ± 164.2       | 1869.1 ± 197.4       | 1836.9 ± 236.7        |                     |                |
|                            | <b>48 hrs</b>              | 491.2 ± 50.3         | 487.5 ± 74.6         | 429.2 ± 16.6          |                     |                |
| <b>AF750-pHLIP-Mutants</b> |                            |                      |                      |                       |                     |                |
| <b>Organs</b>              | <b>Time post-injection</b> | <b>Var3M<br/>n=3</b> | <b>Var7M<br/>n=3</b> | <b>Control</b>        |                     |                |
| <b>Muscle</b>              | <b>2 hrs</b>               | 886.2 ± 197.3        | 628.3 ± 24.2         | 146.9                 |                     |                |
|                            | <b>4 hrs</b>               | 774.2 ± 255.2        | 430.1 ± 47.1         |                       |                     |                |
| <b>Tumor</b>               | <b>2 hrs</b>               | 3444.6 ± 311.3       | 2451.8 ± 162.1       | 144.1                 |                     |                |
|                            | <b>4 hrs</b>               | 3355.9 ± 796.2       | 1562.9 ± 240.4       |                       |                     |                |
| <b>Liver</b>               | <b>2 hrs</b>               | 3954.1 ± 46.2        | 1389.4 ± 129.5       | 144.2                 |                     |                |
|                            | <b>4 hrs</b>               | 2313.2 ± 373.7       | 902.0 ± 79.4         |                       |                     |                |
| <b>Kidney</b>              | <b>2 hrs</b>               | 9114.2 ± 529.2       | 9691.2 ± 176.0       | 146.5                 |                     |                |
|                            | <b>4 hrs</b>               | 8615.9 ± 657.4       | 8275.0 ± 499.0       |                       |                     |                |
| <b>Cy5.5-pHLIPs</b>        |                            |                      |                      |                       |                     |                |
| <b>Organs</b>              | <b>Time post-injection</b> | <b>WT<br/>n=3</b>    | <b>Var3<br/>n=3</b>  | <b>Var3-C<br/>n=3</b> | <b>Var7<br/>n=3</b> | <b>Control</b> |
| <b>Muscle</b>              | <b>2 hrs</b>               | 634.1 ± 83.7         | 918.8 ± 162.6        | 1035.1 ± 63.4         | 638.0 ± 86.3        | 276.1          |
|                            | <b>4 hrs</b>               | 652.3 ± 88.4         | 660.5 ± 36.6         | 719.4 ± 113.4         | 467.3 ± 63.0        |                |

|                     |                            |                   |                     |                     |                |                |
|---------------------|----------------------------|-------------------|---------------------|---------------------|----------------|----------------|
|                     | 24hrs                      | 466.5 ± 54.2      | 424.2 ± 30.8        | 411.3 ± 4.4         | 356.7 ± 16.5   |                |
| <b>Tumor</b>        | 2 hrs                      | 2094.8 ± 497.0    | 3343.2 ± 1526.1     | 3627.7 ± 441.5      | 1900.3 ± 293.5 | 316.9          |
|                     | 4hrs                       | 2882.6 ± 660.6    | 2798.5 ± 395.2      | 3482.0 ± 502.7      | 2076.3 ± 531.5 |                |
|                     | 24hrs                      | 2419.5 ± 226.1    | 2312.5 ± 556.1      | 2371.9 ± 186.9      | 1390.8 ± 141.9 |                |
| <b>Liver</b>        | 2 hrs                      | 4209.2 ± 603.7    | 8118.0 ± 901.8      | 7828.1 ± 1161.2     | 5706.9 ± 719.4 | 259.5          |
|                     | 4hrs                       | 3587.1 ± 127.3    | 5589.0 ± 129.6      | 5916.4 ± 843.6      | 4177.2 ± 278.0 |                |
|                     | 24hrs                      | 2666.9 ± 229.0    | 1513.1 ± 248.1      | 1844.5 ± 437.3      | 1180.8 ± 197.8 |                |
| <b>Kidney</b>       | 2 hrs                      | 2024.9 ± 349.3    | 2641.0 ± 249.2      | 2926.5 ± 223.8      | 2729.3 ± 137.4 | 263.9          |
|                     | 4hrs                       | 1576.9 ± 253.7    | 1998.0 ± 485.3      | 2322.7 ± 335.8      | 2416.3 ± 588.9 |                |
|                     | 24hrs                      | 947.9 ± 198.0     | 1135.4 ± 193.9      | 1116.7 ± 28.6       | 1335.8 ± 174.5 |                |
| <b>IR680-pHLIPs</b> |                            |                   |                     |                     |                |                |
| <b>Organs</b>       | <b>Time post-injection</b> | <b>WT<br/>n=3</b> | <b>Var3<br/>n=3</b> | <b>Var7<br/>n=3</b> |                | <b>Control</b> |
| <b>Muscle</b>       | 2 hrs                      | 523.3 ± 32.9      | 619.2 ± 50.7        | 463.5 ± 73.9        |                | 324.1          |
|                     | 4 hrs                      | 551.6 ± 80.0      | 659.5 ± 56.9        | 401.0 ± 44.6        |                |                |
|                     | 24 hrs                     | 353.6 ± 37.5      | 401.9 ± 53.1        | 363.4 ± 23.2        |                |                |
| <b>Tumor</b>        | 2 hrs                      | 931.9 ± 18.8      | 1370.8 ± 158.3      | 718.9 ± 83.5        |                | 333.1          |
|                     | 4 hrs                      | 906.3 ± 66.0      | 1462.7 ± 114.7      | 597.8 ± 69.8        |                |                |
|                     | 24 hrs                     | 426.7 ± 5.5       | 645.5 ± 185.8       | 719.7 ± 34.1        |                |                |
| <b>Liver</b>        | 2 hrs                      | 917.9 ± 144.1     | 1119.3 ± 97.7       | 569.2 ± 33.3        |                | 270.3          |
|                     | 4 hrs                      | 626.3 ± 52.6      | 1020.2 ± 150.4      | 427.7 ± 47.2        |                |                |
|                     | 24 hrs                     | 305.8 ± 35.3      | 389.4 ± 53.3        | 291.5 ± 33.0        |                |                |
| <b>Kidney</b>       | 2 hrs                      | 1053.0 ± 171.0    | 821.8 ± 30.6        | 1081.4 ± 76.1       |                | 241.7          |
|                     | 4 hrs                      | 758.6 ± 137.3     | 830.5 ± 52.5        | 682.6 ± 107.8       |                |                |
|                     | 24 hrs                     | 353.6 ± 37.5      | 352.4 ± 89.0        | 311.6 ± 34.1        |                |                |
| <b>IR800-pHLIPs</b> |                            |                   |                     |                     |                |                |
| <b>Organs</b>       | <b>Time post-injection</b> | <b>WT<br/>n=3</b> | <b>Var3<br/>n=3</b> | <b>Var7<br/>n=3</b> |                | <b>Control</b> |
| <b>Muscle</b>       | 2 hrs                      | 630.6 ± 53.2      | 736.4 ± 116.0       | 542.9 ± 43.0        |                | 127.3          |
|                     | 4 hrs                      | 612.6 ± 25.1      | 747.9 ± 10.5        | 359.1 ± 27.7        |                |                |
|                     | 24 hrs                     | 255.6 ± 19.7      | 231.6 ± 21.1        | 185.1 ± 14.6        |                |                |
| <b>Tumor</b>        | 2 hrs                      | 1684.9 ± 292.6    | 2289.3 ± 146.0      | 1858.2 ± 271.3      |                | 135.4          |
|                     | 4 hrs                      | 1996.4 ± 581.3    | 3129.0 ± 176.4      | 1585.9 ± 165.8      |                |                |
|                     | 24 hrs                     | 737.5 ± 241.1     | 1349.9 ± 267.3      | 554.9 ± 156.6       |                |                |
| <b>Liver</b>        | 2 hrs                      | 3133.4 ± 179.7    | 3849.9 ± 164.7      | 2337.0 ± 107.9      |                | 140.3          |
|                     | 4 hrs                      | 2969.8 ± 512.7    | 3238.8 ± 127.2      | 1964.7 ± 129.2      |                |                |
|                     | 24 hrs                     | 1863.4 ± 201.1    | 1089.6 ± 165.0      | 972.4 ± 149.9       |                |                |
| <b>Kidney</b>       | 2 hrs                      | 4529.1 ± 547.1    | 5908.6 ± 128.3      | 3885.1 ± 420.8      |                | 143.5          |
|                     | 4 hrs                      | 4015.6 ± 861.0    | 6235.9 ± 470.1      | 3238.1 ± 345.6      |                |                |
|                     | 24 hrs                     | 2998.4 ± 314.5    | 3863.7 ± 478.2      | 3696.5 ± 114.7      |                |                |
| <b>Dy680-pHLIPs</b> |                            |                   |                     |                     |                |                |
| <b>Organs</b>       | <b>Time post-injection</b> | <b>WT<br/>n=3</b> | <b>Var3<br/>n=3</b> | <b>Var7<br/>n=3</b> |                | <b>Control</b> |

|                      |                            |                   |                     |                     |                |
|----------------------|----------------------------|-------------------|---------------------|---------------------|----------------|
| <b>Muscle</b>        | <b>2 hrs</b>               | 754.9 ± 106.3     | 465.4 ± 103.5       | 345.6 ± 4.7         | 172.3          |
|                      | <b>4 hrs</b>               | 694.3 ± 50.6      | 533.2 ± 18.3        | 305.5 ± 16.4        |                |
|                      | <b>24 hrs</b>              | 203.6 ± 4.8       | 274.6 ± 15.8        | 178.9 ± 9.2         |                |
| <b>Tumor</b>         | <b>2 hrs</b>               | 2326.0 ± 183.6    | 1998.2 ± 394.4      | 1029.3 ± 100.8      | 219.0          |
|                      | <b>4 hrs</b>               | 2246.3 ± 627.8    | 2243.3 ± 103.9      | 847.4 ± 73.5        |                |
|                      | <b>24 hrs</b>              | 511.7 ± 129.3     | 897.0 ± 314.3       | 241.1 ± 7.8         |                |
| <b>Liver</b>         | <b>2 hrs</b>               | 1600.0 ± 60.7     | 1243.7 ± 218.2      | 495.5 ± 77.8        | 210.9          |
|                      | <b>4 hrs</b>               | 1284.6 ± 142.6    | 984.2 ± 47.5        | 431.2 ± 65.6        |                |
|                      | <b>24 hrs</b>              | 331.8 ± 46.2      | 373.0 ± 49.8        | 207.5 ± 20.6        |                |
| <b>Kidney</b>        | <b>2 hrs</b>               | 1886.5 ± 227.5    | 1066.6 ± 119.8      | 1242.9 ± 119.1      | 160.2          |
|                      | <b>4 hrs</b>               | 1728.6 ± 45.4     | 1088.9 ± 73.8       | 1004.5 ± 250.7      |                |
|                      | <b>24 hrs</b>              | 327.9 ± 29.1      | 375.4 ± 39.5        | 229.8 ± 22.6        |                |
| <b>DyP680-pHLIPs</b> |                            |                   |                     |                     |                |
| <b>Organs</b>        | <b>Time post-injection</b> | <b>WT<br/>n=3</b> | <b>Var3<br/>n=3</b> | <b>Var7<br/>n=3</b> | <b>Control</b> |
| <b>Muscle</b>        | <b>2 hrs</b>               | 829.6 ± 165.3     | 828.6 ± 389.7       | 416.5 ± 22.7        | 172.3          |
|                      | <b>4 hrs</b>               | 735.1 ± 137.6     | 808.5 ± 14.8        | 367.0 ± 58.5        |                |
|                      | <b>24 hrs</b>              | 478.9 ± 24.9      | 406.4 ± 27.0        | 291.1 ± 22.2        |                |
| <b>Tumor</b>         | <b>2 hrs</b>               | 3832.7 ± 769      | 2883.7 ± 567.7      | 936.2 ± 132.2       | 219.0          |
|                      | <b>4 hrs</b>               | 3679.4 ± 225.9    | 3104.6 ± 162.4      | 1008.8 ± 166.8      |                |
|                      | <b>24 hrs</b>              | 2716.2 ± 512.0    | 2239.8 ± 459.6      | 644.9 ± 60.6        |                |
| <b>Liver</b>         | <b>2 hrs</b>               | 1968.9 ± 354.6    | 1614.4 ± 152        | 488.2 ± 38.9        | 210.9          |
|                      | <b>4 hrs</b>               | 1726.6 ± 343.2    | 1517.9 ± 26.1       | 405.6 ± 71.1        |                |
|                      | <b>24 hrs</b>              | 1290.2 ± 82.3     | 650.6 ± 131.0       | 314.1 ± 27.1        |                |
| <b>Kidney</b>        | <b>2 hrs</b>               | 6047.7 ± 619.5    | 6584.5 ± 640.1      | 5262.3 ± 562.0      | 160.2          |
|                      | <b>4 hrs</b>               | 4757.6 ± 360.8    | 4896.5 ± 656.5      | 5459.7 ± 928.5      |                |
|                      | <b>24 hrs</b>              | 5010.1 ± 364.3    | 5269.3 ± 923.6      | 4576.4 ± 489.9      |                |

**Table S2.** Tumor/muscle, tumor/kidney and tumor/liver ratio values.

| Ratios              | Time post-injection | WT          | Var3        | Var7        |
|---------------------|---------------------|-------------|-------------|-------------|
| <b>AF546-pHLIPs</b> |                     |             |             |             |
| Tumor/Muscle        | 2 hrs               | 3.62 ± 0.77 | 4.86 ± 0.75 | 2.89 ± 0.76 |
|                     | 4 hrs               | 4.68 ± 0.57 | 5.29 ± 1.27 | 4.62 ± 0.67 |
|                     | 24 hrs              | 5.22 ± 1.47 | 9.32 ± 1.45 | 4.23 ± 1.00 |
| Tumor/Kidney        | 2 hrs               | 3.13 ± 0.84 | 5.30 ± 0.83 | 2.40 ± 0.26 |
|                     | 4 hrs               | 5.39 ± 1.70 | 5.23 ± 1.18 | 3.36 ± 0.36 |
|                     | 24 hrs              | 2.45 ± 0.80 | 2.21 ± 0.52 | 1.03 ± 0.38 |
| Tumor/Liver         | 2 hrs               | 2.31 ± 0.60 | 2.83 ± 0.36 | 4.09 ± 0.80 |
|                     | 4 hrs               | 2.88 ± 0.62 | 4.09 ± 0.98 | 5.60 ± 0.36 |
|                     | 24 hrs              | 2.67 ± 1.03 | 9.57 ± 3.14 | 3.76 ± 1.02 |
| <b>AF647-pHLIPs</b> |                     |             |             |             |
| Tumor/Muscle        | 2 hrs               | 2.88 ± 0.21 | 2.95 ± 0.26 | 3.60 ± 0.23 |
|                     | 4 hrs               | 3.25 ± 0.12 | 3.61 ± 0.81 | 3.09 ± 0.58 |
|                     | 24 hrs              | 2.67 ± 0.44 | 3.62 ± 1.66 | 2.81 ± 0.63 |
| Tumor/Kidney        | 2 hrs               | 0.68 ± 0.55 | 0.93 ± 0.26 | 0.65 ± 0.10 |
|                     | 4 hrs               | 0.75 ± 0.12 | 0.85 ± 0.09 | 0.45 ± 0.05 |
|                     | 24 hrs              | 0.66 ± 0.04 | 0.62 ± 0.16 | 0.38 ± 0.14 |
| Tumor/Liver         | 2 hrs               | 1.42 ± 0.30 | 1.48 ± 0.09 | 2.52 ± 0.07 |
|                     | 4 hrs               | 1.34 ± 0.41 | 1.61 ± 0.27 | 2.51 ± 0.25 |
|                     | 24 hrs              | 1.53 ± 0.28 | 2.82 ± 1.04 | 2.64 ± 0.70 |
| <b>AF750-pHLIPs</b> |                     |             |             |             |
| Tumor/Muscle        | 2 hrs               | 3.22 ± 0.18 | 3.80 ± 0.18 | 3.08 ± 0.18 |
|                     | 4 hrs               | 4.16 ± 0.29 | 4.33 ± 0.59 | 3.14 ± 0.11 |
|                     | 24 hrs              | 4.06 ± 0.10 | 2.88 ± 0.30 | 1.54 ± 0.03 |
| Tumor/Kidney        | 2 hrs               | 0.39 ± 0.03 | 0.41 ± 0.03 | 0.32 ± 0.02 |
|                     | 4 hrs               | 0.39 ± 0.04 | 0.45 ± 0.02 | 0.18 ± 0.01 |
|                     | 24 hrs              | 0.46 ± 0.03 | 0.35 ± 0.04 | 0.14 ± 0.01 |
| Tumor/Liver         | 2 hrs               | 0.80 ± 0.05 | 0.82 ± 0.03 | 1.36 ± 0.12 |
|                     | 4 hrs               | 0.80 ± 0.08 | 1.48 ± 0.05 | 1.15 ± 0.05 |
|                     | 24 hrs              | 0.82 ± 0.07 | 1.17 ± 0.04 | 0.76 ± 0.04 |
| <b>Cy5.5-pHLIPs</b> |                     |             |             |             |
| Tumor/Muscle        | 2 hrs               | 3.28 ± 0.23 | 3.54 ± 0.57 | 3.02 ± 0.37 |
|                     | 4 hrs               | 4.50 ± 0.71 | 4.23 ± 0.25 | 4.39 ± 0.32 |
|                     | 24 hrs              | 5.27 ± 0.63 | 5.41 ± 0.53 | 3.91 ± 0.30 |
| Tumor/Kidney        | 2 hrs               | 1.04 ± 0.09 | 1.26 ± 0.31 | 0.70 ± 0.07 |
|                     | 4 hrs               | 1.83 ± 0.19 | 1.42 ± 0.08 | 0.88 ± 0.15 |
|                     | 24 hrs              | 2.60 ± 0.20 | 2.11 ± 0.47 | 1.06 ± 0.13 |
| Tumor/Liver         | 2 hrs               | 0.50 ± 0.04 | 0.41 ± 0.09 | 0.34 ± 0.05 |
|                     | 4 hrs               | 0.80 ± 0.11 | 0.50 ± 0.03 | 0.49 ± 0.06 |
|                     | 24 hrs              | 0.91 ± 0.07 | 1.52 ± 0.10 | 1.20 ± 0.14 |
| <b>IR680-pHLIPs</b> |                     |             |             |             |

|                      |               |             |             |             |
|----------------------|---------------|-------------|-------------|-------------|
| <b>Tumor/Muscle</b>  | <b>2 hrs</b>  | 1.79 ± 0.14 | 2.21 ± 0.08 | 1.57 ± 0.23 |
|                      | <b>4 hrs</b>  | 1.67 ± 0.26 | 2.22 ± 0.12 | 1.50 ± 0.21 |
|                      | <b>24 hrs</b> | 1.22 ± 0.12 | 1.58 ± 0.28 | 1.16 ± 0.13 |
| <b>Tumor/Kidney</b>  | <b>2 hrs</b>  | 0.90 ± 0.16 | 1.67 ± 0.24 | 0.66 ± 0.06 |
|                      | <b>4 hrs</b>  | 1.21 ± 0.17 | 1.76 ± 0.12 | 0.89 ± 0.12 |
|                      | <b>24 hrs</b> | 1.37 ± 0.12 | 1.82 ± 0.23 | 1.36 ± 0.25 |
| <b>Tumor/Liver</b>   | <b>2 hrs</b>  | 1.03 ± 0.19 | 1.23 ± 0.11 | 1.26 ± 0.10 |
|                      | <b>4 hrs</b>  | 1.46 ± 0.18 | 1.45 ± 0.34 | 1.40 ± 0.20 |
|                      | <b>24 hrs</b> | 1.40 ± 0.16 | 1.64 ± 0.32 | 1.45 ± 0.12 |
| <b>IR800-pHLIPs</b>  |               |             |             |             |
| <b>Tumor/Muscle</b>  | <b>2 hrs</b>  | 2.70 ± 0.66 | 3.15 ± 0.37 | 3.46 ± 0.72 |
|                      | <b>4 hrs</b>  | 3.24 ± 0.82 | 4.18 ± 0.18 | 4.45 ± 0.80 |
|                      | <b>24 hrs</b> | 2.88 ± 0.92 | 5.79 ± 0.67 | 2.97 ± 0.61 |
| <b>Tumor/Kidney</b>  | <b>2 hrs</b>  | 0.38 ± 0.09 | 0.39 ± 0.02 | 0.48 ± 0.02 |
|                      | <b>4 hrs</b>  | 0.50 ± 0.10 | 0.50 ± 0.02 | 0.49 ± 0.02 |
|                      | <b>24 hrs</b> | 0.24 ± 0.06 | 0.35 ± 0.05 | 0.15 ± 0.04 |
| <b>Tumor/Liver</b>   | <b>2 hrs</b>  | 0.54 ± 0.07 | 0.59 ± 0.04 | 0.80 ± 0.11 |
|                      | <b>4 hrs</b>  | 0.67 ± 0.15 | 0.97 ± 0.08 | 0.80 ± 0.08 |
|                      | <b>24 hrs</b> | 0.39 ± 0.12 | 1.23 ± 0.12 | 0.56 ± 0.07 |
| <b>Dy680-pHLIPs</b>  |               |             |             |             |
| <b>Tumor/Muscle</b>  | <b>2 hrs</b>  | 3.11 ± 0.29 | 4.32 ± 0.53 | 2.98 ± 0.33 |
|                      | <b>4 hrs</b>  | 3.28 ± 1.09 | 4.21 ± 0.33 | 2.77 ± 0.10 |
|                      | <b>24 hrs</b> | 2.51 ± 0.61 | 3.25 ± 1.02 | 1.35 ± 0.03 |
| <b>Tumor/Kidney</b>  | <b>2 hrs</b>  | 1.24 ± 0.29 | 1.86 ± 0.20 | 0.83 ± 0.02 |
|                      | <b>4 hrs</b>  | 1.30 ± 0.39 | 2.06 ± 0.06 | 0.87 ± 0.18 |
|                      | <b>24 hrs</b> | 1.58 ± 0.48 | 2.40 ± 0.90 | 1.05 ± 0.07 |
| <b>Tumor/Liver</b>   | <b>2 hrs</b>  | 1.45 ± 0.09 | 1.60 ± 0.10 | 2.09 ± 0.15 |
|                      | <b>4 hrs</b>  | 1.77 ± 0.56 | 2.29 ± 0.21 | 1.99 ± 0.25 |
|                      | <b>24 hrs</b> | 1.53 ± 0.19 | 2.38 ± 0.64 | 1.17 ± 0.08 |
| <b>DyP680-pHLIPs</b> |               |             |             |             |
| <b>Tumor/Muscle</b>  | <b>2 hrs</b>  | 4.62 ± 0.19 | 3.86 ± 1.22 | 2.24 ± 0.23 |
|                      | <b>4 hrs</b>  | 5.15 ± 1.14 | 3.84 ± 0.13 | 2.78 ± 0.59 |
|                      | <b>24 hrs</b> | 5.65 ± 0.81 | 5.48 ± 0.84 | 2.21 ± 0.04 |
| <b>Tumor/Kidney</b>  | <b>2 hrs</b>  | 0.64 ± 0.15 | 0.44 ± 0.09 | 0.18 ± 0.02 |
|                      | <b>4 hrs</b>  | 0.78 ± 0.09 | 0.64 ± 0.11 | 0.19 ± 0.01 |
|                      | <b>24 hrs</b> | 0.55 ± 0.12 | 0.42 ± 0.03 | 0.14 ± 0.02 |
| <b>Tumor/Liver</b>   | <b>2 hrs</b>  | 1.94 ± 0.14 | 1.78 ± 0.23 | 1.92 ± 0.27 |
|                      | <b>4 hrs</b>  | 2.17 ± 0.31 | 2.05 ± 0.12 | 2.49 ± 0.03 |
|                      | <b>24 hrs</b> | 2.11 ± 0.40 | 3.44 ± 0.02 | 2.06 ± 0.19 |

**Table S3.** Contrast Index (CI) calculated for 2 and 4 hours time points.

| Time post-injection  | WT          | Var3        | Var7        |
|----------------------|-------------|-------------|-------------|
| <b>AF546-pHLIPs</b>  |             |             |             |
| 2 hrs                | 4.06 ± 0.88 | 5.60 ± 0.92 | 3.18 ± 0.90 |
| 4 hrs                | 5.22 ± 0.61 | 6.01 ± 1.55 | 5.54 ± 0.81 |
| <b>AF647-pHLIPs</b>  |             |             |             |
| 2 hrs                | 4.03 ± 0.58 | 3.41 ± 0.35 | 2.61 ± 0.07 |
| 4 hrs                | 5.12 ± 0.39 | 4.72 ± 1.39 | 7.18 ± 3.70 |
| <b>AF750-pHLIPs</b>  |             |             |             |
| 2 hrs                | 3.59 ± 0.40 | 4.19 ± 0.37 | 3.49 ± 0.39 |
| 4 hrs                | 4.88 ± 0.92 | 4.95 ± 1.28 | 4.13 ± 0.39 |
| <b>Cy5.5-pHLIPs</b>  |             |             |             |
| 2 hrs                | 4.96 ± 0.56 | 4.55 ± 1.19 | 4.58 ± 1.47 |
| 4 hrs                | 7.16 ± 2.54 | 6.44 ± 0.63 | 9.27 ± 0.37 |
| <b>IR680-pHLIPs</b>  |             |             |             |
| 2 hrs                | 1.79 ± 0.14 | 2.21 ± 0.08 | 1.57 ± 0.23 |
| 4 hrs                | 1.67 ± 0.26 | 2.22 ± 0.12 | 1.50 ± 0.21 |
| <b>IR800-pHLIPs</b>  |             |             |             |
| 2 hrs                | 3.13 ± 0.87 | 3.61 ± 0.55 | 4.21 ± 1.00 |
| 4 hrs                | 3.80 ± 0.10 | 4.82 ± 0.21 | 6.37 ± 1.46 |
| <b>Dy680-pHLIPs</b>  |             |             |             |
| 2 hrs                | 3.67 ± 0.48 | 6.27 ± 1.13 | 4.69 ± 0.71 |
| 4 hrs                | 3.97 ± 1.50 | 5.63 ± 0.56 | 4.72 ± 0.07 |
| <b>DyP680-pHLIPs</b> |             |             |             |
| 2 hrs                | 5.55 ± 0.40 | 4.99 ± 2.44 | 2.92 ± 0.36 |
| 4 hrs                | 6.43 ± 1.50 | 4.53 ± 0.15 | 4.25 ± 1.40 |

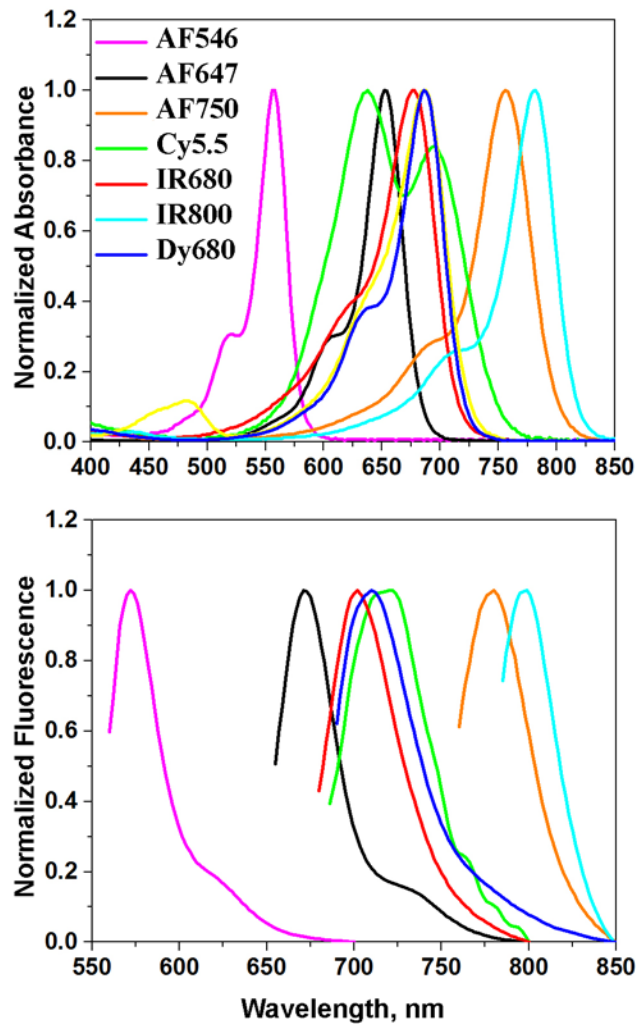

**Figure S1.** Absorption and fluorescence spectra of fluorescent-conjugates measured in PBS.
